# Supplementary material for: MicroRNAs modulate ethylene induced retrograde signal for rice endosperm starch biosynthesis by default expression of transcriptome
Source: PubMed Central journal article supplement (PMC7946924; doi:10.1038/s41598-021-84663-2), 2021-03-10
Supplement: 41598_2021_84663_MOESM1_ESM.pdf [file 41598_2021_84663_MOESM1_ESM.pdf]

# **MicroRNAs Modulate Ethylene Induced Retrograde Signal for Rice Endosperm Starch Biosynthesis by Default Expression of Transcriptome.**

Sonam Panigrahi<sup>1#</sup>, Madhusmita Panigrahy<sup>2#</sup>, Ekamber Kariali<sup>1#</sup>, Sushanta Kumar Dash<sup>3#</sup>, Binod Bihari Sahu<sup>4#</sup>, Sushil Kumar Sahu<sup>5</sup>, Pravat Kumar Mohapatra<sup>1+</sup>, Kishore Chandra Sekhar Panigrahi<sup>6,7+</sup>

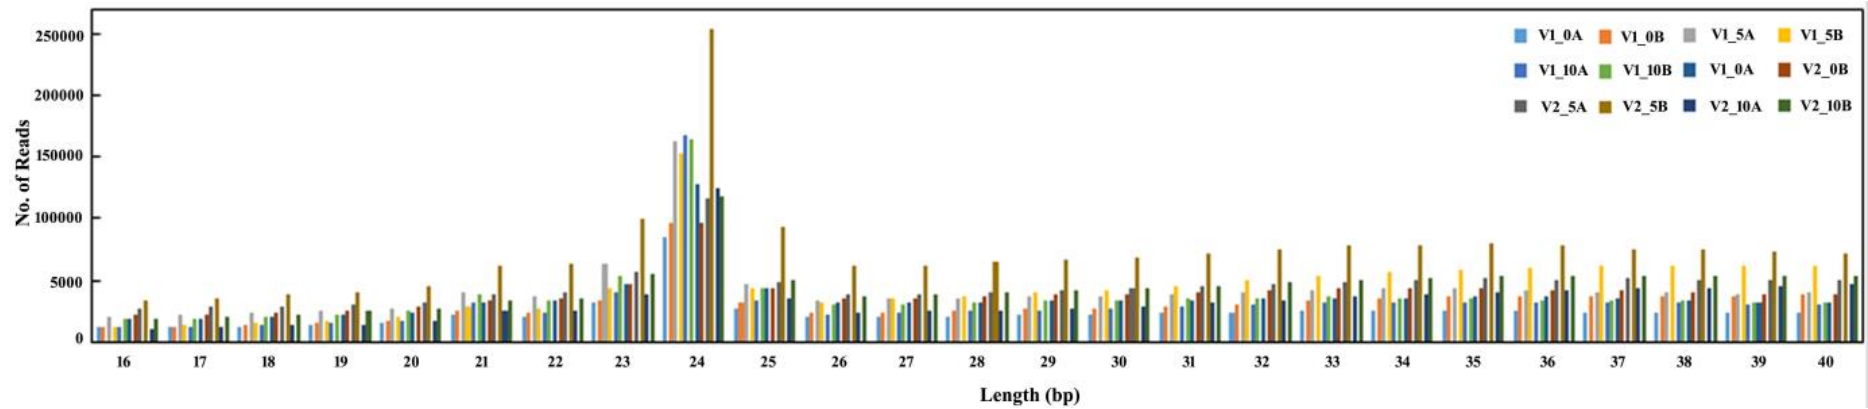

Supplementary Fig 1.

Bar diagram showing read lengths of whole miRNAs in apical and basal spikelets of V1 (SR-159) and V2 (SR-157) during post anthesis (0, 5 and 10 days). All samples name are in figure inlay and distribution pattern in different colour bar diagram.

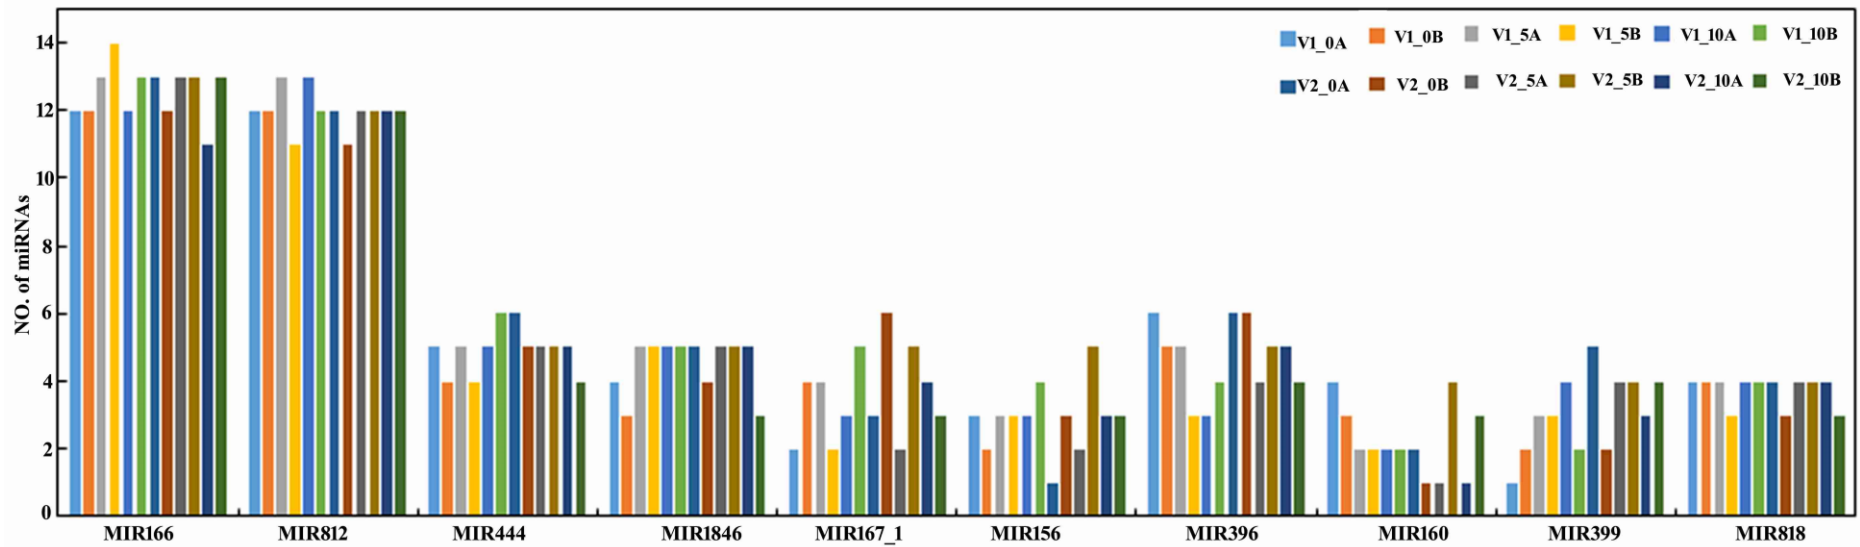

Supplementary Fig 2.

Distribution of 10 best matching families of miRNAs after homology search against *O. sativa* genome. All sequences  $\geq 16$  bp and  $\leq 40$  bp length were aligned to Rice genome using Bowtie-1.1.1 and miRbase-21.3 database through NCBI-Blast-2.2.30. MIR166 family is most abundant family identified followed by MIR812, MIR444 etc. All samples name are in figure inlay and distribution pattern in different colour bar diagram.

Supplementary Table 1. Read statistics of the miRNAs in the apical and basal spikelets of V1 (SR-159) and V2 (SR-157) samples during post anthesis (0, 5 and 10 days). Trimmed Unique Reads: Total Unique reads in the length of 16-40 after adaptor trimming, Clustered reads: Reads based on 100% coverage and similarity, Reads aligned to miRbase 21.3: Number of reads aligned to mirBase ([www.mirbase.org](http://www.mirbase.org)) sequences @ evalue e-3.

|                                  | V1_0_A   | V1_0_B   | V1_5_A   | V1_5_B   | V1_10_A  | V1_10_B  | V2_0_A   | V2_0_B   | V2_5_A   | V2_5_B   | V2_10_A  | V2_10_B  |
|----------------------------------|----------|----------|----------|----------|----------|----------|----------|----------|----------|----------|----------|----------|
| <b>Total Reads</b>               | 12663057 | 15398985 | 15214253 | 15001103 | 15373790 | 15533686 | 11699877 | 14663099 | 14151097 | 27680321 | 15257092 | 14821029 |
| <b>Trimmed Unique Reads</b>      | 597863   | 759393   | 1055506  | 1130130  | 802850   | 942292   | 895198   | 972985   | 1141823  | 1840354  | 844053   | 1130462  |
| <b>Reads aligned to genome</b>   | 523653   | 650162   | 879596   | 928853   | 673428   | 771094   | 809320   | 832221   | 907736   | 1459010  | 720568   | 913939   |
| <b>Reads aligned to mirBase</b>  | 1437     | 1704     | 1853     | 1554     | 1738     | 1760     | 1945     | 1398     | 1366     | 2341     | 1347     | 1313     |
| <b>% reads aligned to genome</b> | 87.59    | 85.62    | 83.33    | 82.19    | 83.88    | 81.83    | 90.41    | 85.53    | 79.5     | 79.28    | 85.37    | 80.85    |
| <b>Known miRNA</b>               | 196      | 199      | 214      | 191      | 191      | 219      | 206      | 194      | 171      | 229      | 190      | 186      |
| <b>Unannotated</b>               | 4207     | 6216     | 8553     | 6991     | 6748     | 8259     | 5603     | 6324     | 8264     | 14593    | 5461     | 7113     |

Supplementary Table 2. Sequences of primers to amplify selected miRNAs for qRT-PCR analysis (2 a) and primer sequences of genes for different ethylene receptors and signal transducers and enzymes of Auxin (DAO) and Ethylene (ACCS) homeostasis pathways (2 b).

| <b>SI No</b> | <b>miRNA</b>    | <b>Type</b>   | <b>Forward primer</b>      |
|--------------|-----------------|---------------|----------------------------|
| 1            | Os_U51-1a_1     | control miRNA |                            |
| 2            | Os_miR398b_1    | Test          | 5'UGUGUUCUCAGGUCGCCCCUG    |
| 3            | Os_miR529b_1    | Test          | 5'AGAAGAGAGAGAGUACAGCUU    |
| 4            | Os_miR820a_1    | Test          | 5'UCGGCCUCGUGGAUGGACCAG    |
| 5            | Os_miR2055_1    | Test          | 5'UUUCCUUGGGAAGGUGGUUC     |
| 6            | Os_miR2106_1    | Test          | 5'CCGAGGUUUUCUGGAUACAUU    |
| 7            | Os_miR2877_1    | Test          | 5'UUGCAUCCUCUGCACUUUGGGCCU |
| 8            | Os_miR530-5p_1  | Test          | 5'UGCAUUUGCACCUGCACCUA     |
| 9            | Os_miR396d_1    | Test          | 5'UCCACAGGCUUUCUUGAACUG    |
| 10           | Os_miR166a-3p_1 | Test          | 5'UCGGACCAGGCUUCAUUCCCC    |

Supplementary Table 3. Relative fold change in the expression pattern of different miRNAs in V2 ( SR-157) over V1 (SR-159) samples in 0 day apical, 0 day basal, 5 days apical, 5 days basal, 10 days apical and 10 days basal spikelets. Positive and negative values indicate UP- and DOWN-regulation respectively.

| miRNA                 | Relative Fold Change (FC) |               |               |               |                 |                 |
|-----------------------|---------------------------|---------------|---------------|---------------|-----------------|-----------------|
|                       | V2_0_A/V1_0_A             | V2_0_B/V1_0_B | V2_5_A/V1_5_A | V2_5_B/V1_5_B | V2_10_A/V1_10_A | V2_10_B/V1_10_B |
| osa-miR156k           |                           |               |               | -2.000        |                 |                 |
| osa-miR156l-5p        |                           |               |               |               | -2.000          | -1.585          |
| osa-miR159b           | -2.361                    | -3.000        | -2.656        | 2.322         | -2.923          | -4.119          |
| osa-miR159f           |                           | -3.170        |               |               | -4.644          | -4.459          |
| osa-miR160e-5p        |                           | 2.322         |               |               |                 | 2.322           |
| <b>osa-miR162a</b>    |                           |               |               |               | -2.807          | -3.000          |
| <b>osa-miR162b</b>    | -1.585                    | -1.585        | -2.135        |               |                 |                 |
| osa-miR164d           |                           |               |               | 2.170         | 2.000           | -2.000          |
| osa-miR166c-3p        |                           |               |               |               | -1.687          | 4.542           |
| osa-miR166h-3p        |                           |               | 2.673         | -4.273        |                 |                 |
| osa-miR166i-3p        | 1.778                     | -1.874        |               |               | -2.170          |                 |
| osa-miR166k-3p        |                           | 4.644         | -2.187        |               | -2.681          | -6.629          |
| osa-miR166a-5p        |                           |               | 2.566         | 1.585         | -3.000          |                 |
| osa-miR166b-5p        |                           |               |               |               | -2.170          |                 |
| <b>osa-miR166c-5p</b> |                           |               | -3.550        | -2.322        | 1.585           |                 |

|                            |        |        |        |       |        |        |
|----------------------------|--------|--------|--------|-------|--------|--------|
| osa-miR166d-5p             |        |        |        |       | 4.755  |        |
| osa-miR166h-5p             | -1.585 | -2.000 |        |       |        |        |
| osa-miR166j-5p             |        |        | 1.865  |       | 1.585  |        |
| osa-miR166k-5p             |        |        |        | 1.807 |        |        |
| osa-miR166l-5p             |        |        | 2.035  |       |        |        |
| osa-miR166m                | 3.087  | 3.585  | 1.673  |       | 2.663  | -7.901 |
| osa-miR167d-3p             |        | 2.322  |        |       |        |        |
| osa-miR168a-3p             | 5.807  | -2.225 | -2.812 |       | -7.775 | -4.718 |
| osa-miR168a-5p             |        | -3.055 | -1.977 |       | -2.383 | -3.457 |
| osa-miR169c                | 1.585  |        |        | 2.644 |        |        |
| osa-miR169p                |        | 5.322  |        |       |        |        |
| <b>osa-miR319a-3p.2-3p</b> |        |        | -1.798 |       | -2.048 |        |
| osa-miR390-5p              | -4.392 |        | -3.250 |       | -5.087 |        |
| osa-miR393b-3p             | 1.585  | -2.322 |        |       |        |        |
| osa-miR393b-5p             |        | -1.585 |        |       | 1.585  |        |
| osa-miR396e-5p             |        | 2.722  | 6.428  |       | 1.737  | -4.755 |
| osa-miR396f-               |        | -2.000 |        |       |        |        |

|                      |        |        |         |        |        |         |
|----------------------|--------|--------|---------|--------|--------|---------|
| 3p                   |        |        |         |        |        |         |
| <b>osa-miR396h</b>   |        |        |         | 1.585  |        | 4.524   |
| osa-miR397a          | -3.000 | -2.222 |         | -2.000 | 2.170  |         |
| osa-miR397b          | 6.172  | 4.664  | 7.178   | -8.834 | 7.762  | 8.542   |
| <b>osa-miR398b</b>   | -3.036 | -2.732 | 5.151   |        |        | -1.601  |
| osa-miR399j          | -3.248 | -3.000 | -1.872  |        | -1.585 |         |
| osa-miR408-5p        |        | -1.666 |         | -2.135 |        |         |
| osa-miR414           |        |        |         | -1.585 |        |         |
| osa-miR444b.2        |        |        | -3.637  |        | -2.000 | -2.524  |
| osa-miR444c.1        |        |        |         |        | -2.459 |         |
| osa-miR444d.3        |        | 2.807  |         |        | 3.459  |         |
| osa-miR444e          |        | -3.170 | -2.357  |        | -2.807 | -2.585  |
| osa-miR528-3p        |        | -3.369 |         |        |        |         |
| <b>osa-miR529a</b>   | 1.874  |        |         |        |        | -1.807  |
| <b>osa-miR529b</b>   |        |        | -10.878 | 9.533  | 4.988  | -10.237 |
| osa-miR530-3p        |        |        |         | 4.022  |        | 2.322   |
| <b>osa-miR530-5p</b> | 3.459  |        |         | 1.585  |        | -3.907  |
| osa-miR531a          |        |        | -1.815  | 1.682  |        | -1.965  |
| <b>osa-miR535-5p</b> |        |        |         | 2.585  |        |         |
| osa-miR812d          | 3.755  |        |         | 2.858  |        | 1.585   |
| osa-miR812i          |        |        |         | -2.000 |        |         |



|                    |        |        |        |        |        |        |
|--------------------|--------|--------|--------|--------|--------|--------|
| osa-miR812k        |        |        |        | -2.000 |        |        |
| osa-miR812o-3p     |        |        |        |        | 2.000  |        |
| osa-miR812o-5p     |        |        |        |        | 1.585  | 2.322  |
| osa-miR812s        |        |        | 2.035  |        | -2.807 | -2.322 |
| osa-miR812v        |        |        |        |        | -1.585 |        |
| osa-miR815b        | -1.585 | -2.000 |        | -2.585 |        |        |
| <b>osa-miR818e</b> |        | -2.000 | -2.872 |        | 2.000  |        |
| <b>osa-miR820c</b> | 4.459  |        | -1.693 | 1.755  |        | -2.515 |
| osa-miR827         |        | -3.000 | -1.550 | 2.170  |        |        |
| osa-miR1425-5p     |        | -2.322 | -2.872 |        |        |        |
| osa-miR1428e-3p    |        |        |        | 1.807  |        |        |
| osa-miR1432-5p     |        |        |        | 1.700  |        |        |
| <b>osa-miR1436</b> |        |        |        | 2.170  |        | 2.322  |
| <b>osa-miR1441</b> |        |        | -3.835 | -2.000 |        |        |
| osa-miR171f-3p     |        | -2.000 |        |        |        |        |
| osa-miR1846a-3p    |        | 1.585  |        |        |        |        |
| osa-miR1846b-5p    | -1.731 |        |        | 1.680  |        |        |
| osa-miR1846d-3p    | 1.585  |        | 2.035  |        |        |        |
| osa-miR1846e       | -6.426 | 3.322  | -4.594 | -5.087 | -5.358 | 3.585  |
| osa-miR1848        |        | 1.585  |        |        |        |        |

|                       |       |        |        |        |        |        |
|-----------------------|-------|--------|--------|--------|--------|--------|
| <b>osa-miR1862b</b>   |       | 2.000  | -2.135 |        | -2.322 | -1.585 |
| <b>osa-miR1862d</b>   |       |        | -3.135 |        | -2.807 | -3.700 |
| <b>osa-miR1862e</b>   |       |        |        | -2.000 |        |        |
| <b>osa-miR1868</b>    |       |        |        |        | 1.585  |        |
| osa-miR1874-3p        |       |        | -1.720 | 3.110  |        |        |
| osa-miR1874-5p        |       |        |        | 3.781  |        | -2.322 |
| osa-miR1876           |       | -2.585 | -5.104 |        | -3.237 | -3.026 |
| <b>osa-miR1877</b>    |       |        |        | 2.807  | 2.000  |        |
| <b>osa-miR1878</b>    |       |        |        |        | -2.000 |        |
| <b>osa-miR1879</b>    |       | 1.585  |        |        |        |        |
| <b>osa-miR2055</b>    |       |        |        | -2.933 | 1.585  |        |
| osa-miR2091-5p        |       |        |        |        | 3.459  |        |
| <b>osa-miR2092-3p</b> |       |        |        |        | 1.585  |        |
| osa-miR2093-3p        |       |        |        | 1.585  |        |        |
| osa-miR2094-5p        |       |        |        | 3.807  |        |        |
| osa-miR2101-3p        | 1.585 |        | -2.357 | -2.000 |        |        |
| <b>osa-miR2102-3p</b> |       |        |        | 2.807  | 2.000  | 3.000  |
| <b>osa-miR2106</b>    |       | -2.585 | 4.258  |        | 2.415  | 5.807  |
| <b>osa-</b>           |       |        | 2.772  |        |        |        |

|                        |        |        |        |        |        |        |
|------------------------|--------|--------|--------|--------|--------|--------|
| <b>miR2121a</b>        |        |        |        |        |        |        |
| <b>osa-miR2275c</b>    |        | -2.737 |        |        |        |        |
| <b>osa-miR2275d</b>    | 1.585  | -4.248 |        |        |        |        |
| <b>osa-miR2867-5p</b>  |        | -1.585 |        |        |        |        |
| <b>osa-miR2871a-5p</b> |        |        | -2.009 |        |        |        |
| <b>osa-miR2873b</b>    |        |        |        | -2.000 |        |        |
| <b>osa-miR2877</b>     |        |        | -2.135 |        |        |        |
| <b>osa-miR2932</b>     |        |        |        |        | -2.000 |        |
| <b>osa-miR5072</b>     |        |        | -1.653 |        |        | -2.502 |
| <b>osa-miR5073</b>     |        |        |        | -3.322 |        |        |
| <b>osa-miR5076</b>     | -2.807 |        |        |        |        | -1.585 |
| <b>osa-miR5083</b>     |        |        |        |        | -2.000 | 2.000  |
| <b>osa-miR5143a</b>    |        |        |        |        | -1.585 |        |
| <b>osa-miR5144-5p</b>  | -2.322 |        |        |        |        | -2.000 |
| <b>osa-miR5148b</b>    |        | -1.585 |        |        |        |        |
| <b>osa-miR5150-3p</b>  | 2.322  |        |        |        |        |        |
| <b>osa-miR5148b</b>    |        | -1.585 |        |        |        |        |
| <b>osa-miR5150-3p</b>  |        |        |        | 2.000  |        |        |
| <b>osa-miR5159</b>     |        |        |        | 1.807  |        |        |

|                    |        |        |        |        |        |        |
|--------------------|--------|--------|--------|--------|--------|--------|
| <b>osa-miR5160</b> |        |        |        | -1.585 |        |        |
| <b>osa-miR5493</b> | -1.739 |        |        |        |        | -1.866 |
| <b>osa-miR5502</b> | 2.807  | 5.322  | -2.720 |        | 2.000  |        |
| <b>osa-miR5504</b> |        |        |        |        | 1.585  |        |
| <b>osa-miR5792</b> |        | -2.322 |        |        |        |        |
| <b>osa-miR5794</b> |        | -2.807 |        |        |        | -1.807 |
| <b>osa-miR5801</b> |        |        |        |        | -1.585 |        |
| <b>osa-miR5810</b> |        |        | -1.965 | 2.459  | -2.000 | -2.585 |
| <b>osa-miR5814</b> |        |        |        | 1.807  |        |        |
| <b>osa-miR5817</b> |        |        |        |        | 1.585  |        |
| <b>osa-miR5824</b> |        | 2.322  |        |        |        |        |
| <b>osa-miR5825</b> |        |        |        | 2.459  |        |        |

Supplementary Table 4. Prediction of targets of ‘Unique miRNAs’ involved in ethylene pathway. The miRNAs unique to V1 (SR-159) or V2 (SR-157) were searched for their targets using miRbase ([www.mirbase.org](http://www.mirbase.org)) and pSRNA Target Server (<https://plantgrn.noble.org/psRNATarget/email>).

| miRNA          | Targets         | Description                                                                     | P-value |
|----------------|-----------------|---------------------------------------------------------------------------------|---------|
| <b>V1-0A</b>   |                 |                                                                                 |         |
| osa-miR1432-5p | Os04t0169100-01 | Similar to Ethylene receptor-like protein 1.                                    | 0.0789  |
| osa-miR5526    | Os02t0820900-02 | Similar to Ethylene receptor-like protein 2.                                    | 0.5000  |
| osa-miR5526    | Os09t0327300-01 | Similar to Plastid 5,10-methylene-tetrahydrofolate dehydrogenase (Fragment).    | 0.5000  |
| osa-miR5526    | Os03t0324300-04 | Similar to ETHYLENE-INSENSITIVE3-like 1 protein.                                | 0.5000  |
| osa-miR5526    | Os03t0324300-02 | Similar to ETHYLENE-INSENSITIVE3-like 1 protein.                                | 0.5000  |
| osa-miR5542    | Os02t0820900-03 | Ethylene receptor, Ethylene response, Floral transition and starch accumulation | 0.5000  |
| osa-miR2877    | Os07t0239400-01 | Similar to Ethylene-responsive small GTP-binding protein.                       | 0.5000  |

#### V1-0B

|                |                 |                                                                                                                                 |        |
|----------------|-----------------|---------------------------------------------------------------------------------------------------------------------------------|--------|
| osa-miR160a-5p | Os09t0451400-01 | 1-aminocyclopropane-1-carboxylate oxidase 1 (EC 1.14.17.4) (ACC oxidase 1) (Ethylene-forming enzyme) (EFE).                     | 0.1027 |
| osa-miR2877    | Os07t0239400-01 | Similar to Ethylene-responsive small GTP-binding protein.                                                                       | 0.5000 |
| osa-miR167h-3p | Os06t0194000-01 | Similar to Ethylene-responsive transcription factor 3 (Ethylene-responsive element binding factor 3 homolog) (EREBP-5) (NtERF5) | 0.2500 |
| osa-miR167h-3p | Os06t0194000-02 | Similar to Ethylene-responsive transcription factor 3 (Ethylene-responsive element binding factor 3 homolog) (EREBP-5) (NtERF5) | 0.2500 |

#### V2-0A

|                 |                 |                                                                                                                                  |        |
|-----------------|-----------------|----------------------------------------------------------------------------------------------------------------------------------|--------|
| osa-miR1428e-3p | Os07t0178100-01 | Similar to ETO1-like protein 1 (Ethylene overproducer 1-like protein 1).                                                         | 0.2500 |
| osa-miR167h-3p  | Os06t0194000-01 | Similar to Ethylene-responsive transcription factor 3 (Ethylene-responsive element binding factor 3 homolog) (EREBP-5) (NtERF5). | 0.1904 |
| osa-miR167h-3p  | Os06t0194000-01 | Similar to Ethylene-responsive transcription factor 3 (Ethylene-responsive element binding factor 3 homolog) (EREBP-5) (NtERF5). | 0.1904 |
| osa-miR160a-5p  | Os09t0451400-01 | 1-aminocyclopropane-1-carboxylate oxidase 1 (EC 1.14.17.4) (ACC oxidase 1) (Ethylene-forming enzyme) (EFE).                      | 0.0481 |

#### V2-0B

|                |                 |                                                                  |        |
|----------------|-----------------|------------------------------------------------------------------|--------|
| osa-miR166k-5p | Os07t0155600-01 | Nramp ion-transporter family protein, Ethylene signaling pathway | 0.1070 |
|----------------|-----------------|------------------------------------------------------------------|--------|

|               |                 |                                                                                                                                                           |        |
|---------------|-----------------|-----------------------------------------------------------------------------------------------------------------------------------------------------------|--------|
| osa-miR159a.2 | Os02t0764700-01 | Similar to Ethylene-responsive transcription factor 4 (Ethylene-responsive element binding factor 4) (Related to APETALA-2 protein 5) (EREBP-4) (AtERF4). | 0.2500 |
|---------------|-----------------|-----------------------------------------------------------------------------------------------------------------------------------------------------------|--------|

#### V1-5A

|                |                 |                                                                                                                                     |        |
|----------------|-----------------|-------------------------------------------------------------------------------------------------------------------------------------|--------|
| osa-miR396a-5p | Os03t0294700-01 | Putative E3 ubiquitin ligase, Ethylene-overproduction protein1, Drought and submergence tolerance, Regulation of ethylene synthesis | 0.1610 |
| osa-miR5532    | Os05t0155200-01 | Similar to Ethylene receptor.                                                                                                       | 0.1619 |

#### V1-5B

|                |                 |                                                                                                                                                           |        |
|----------------|-----------------|-----------------------------------------------------------------------------------------------------------------------------------------------------------|--------|
| osa-miR159a.2  | Os02t0764700-01 | Similar to Ethylene-responsive transcription factor 4 (Ethylene-responsive element binding factor 4) (Related to APETALA-2 protein 5) (EREBP-4) (AtERF4). | 0.3673 |
| osa-miR2092-5p | Os05t0155200-02 | Similar to Ethylene receptor-like protein (Fragment).                                                                                                     | 0.8571 |
| osa-miR2092-5p | Os05t0155200-01 | Similar to Ethylene receptor.                                                                                                                             | 0.8571 |
| osa-miR2932    | Os09t0490200-01 | Similar to Ethylene signal transcription factor.                                                                                                          | 0.3673 |
| osa-miR2877    | Os07t0239400-01 | Similar to Ethylene-responsive small GTP-binding protein.                                                                                                 | 0.2222 |

#### V2-5A

|                |                 |                                                                                                                                                           |        |
|----------------|-----------------|-----------------------------------------------------------------------------------------------------------------------------------------------------------|--------|
| osa-miR159a.2  | Os02t0764700-01 | Similar to Ethylene-responsive transcription factor 4 (Ethylene-responsive element binding factor 4) (Related to APETALA-2 protein 5) (EREBP-4) (AtERF4). | 0.8452 |
| osa-miR166k-5p | Os07t0155600-01 | Nramp ion-transporter family protein, Ethylene signaling pathway                                                                                          | 0.1207 |
| osa-miR396c-5p | Os03t0294700-01 | Putative E3 ubiquitin ligase, Ethylene-overproduction protein1, Drought and submergence tolerance, Regulation of ethylene synthesis                       | 0.1117 |
| osa-miR2096-5p | Os10t0390800-01 | Similar to Ethylene-responsive transcription factor 3 (Ethylene-responsive element binding factor 3) (EREBP-3) (AtERF3).                                  | 0.5817 |
| osa-miR2096-5p | Os02t0764700-01 | Similar to Ethylene-responsive transcription factor 4 (Ethylene-responsive element binding factor 4) (Related to APETALA-2 protein 5) (EREBP-4) (AtERF4). | 0.5817 |
| osa-miR2877    | Os07t0239400-01 | Similar to Ethylene-responsive small GTP-binding protein.                                                                                                 | 0.5817 |

#### V2-5B

|             |                 |                                                                                                                          |        |
|-------------|-----------------|--------------------------------------------------------------------------------------------------------------------------|--------|
| osa-miR1427 | Os03t0815800-01 | Similar to Ethylene-responsive transcription factor 5 (Ethylene-responsive element binding factor 5) (EREBP-5) (AtERF5). | 0.5926 |
|-------------|-----------------|--------------------------------------------------------------------------------------------------------------------------|--------|

|                |                 |                                                                                                                                                           |        |
|----------------|-----------------|-----------------------------------------------------------------------------------------------------------------------------------------------------------|--------|
| osa-miR2102-5p | Os02t0764700-01 | Similar to Ethylene-responsive transcription factor 4 (Ethylene-responsive element binding factor 4) (Related to APETALA-2 protein 5) (EREBP-4) (AtERF4). | 0.3951 |
| osa-miR6246    | Os09t0327300-01 | Similar to Plastid 5,10-methylene-tetrahydrofolate dehydrogenase (Fragment).                                                                              | 0.8889 |
| osa-miR396a-5p | Os03t0294700-01 | Putative E3 ubiquitin ligase, Ethylene-overproduction protein1, Drought and submergence tolerance, Regulation of ethylene synthesis                       | 0.2235 |

#### V1-10A

|                |                 |                                                                                                                                     |        |
|----------------|-----------------|-------------------------------------------------------------------------------------------------------------------------------------|--------|
| osa-miR2877    | Os07t0239400-01 | Similar to Ethylene-responsive small GTP-binding protein.                                                                           | 0.0947 |
| osa-miR5338    | Os02t0202000-00 | Similar to ethylene responsive element.                                                                                             | 0.5000 |
| osa-miR396a-5p | Os03t0294700-01 | Putative E3 ubiquitin ligase, Ethylene-overproduction protein1, Drought and submergence tolerance, Regulation of ethylene synthesis | 0.5000 |
| osa-miR414     | Os07t0617000-02 | Similar to Ethylene response factor 2.                                                                                              | 0.5000 |
| osa-miR414     | Os07t0617000-01 | Similar to Ethylene response factor 2.                                                                                              | 0.5000 |
| osa-miR414     | Os07t0617000-02 | Similar to Ethylene response factor 2.                                                                                              | 0.5000 |
| osa-miR414     | Os07t0617000-01 | Similar to Ethylene response factor 2.                                                                                              | 0.5000 |

#### V1-10B

|                |                 |                                                           |        |
|----------------|-----------------|-----------------------------------------------------------|--------|
| osa-miR1432-5p | Os04t0169100-01 | Similar to Ethylene receptor-like protein 1.              | 0.0819 |
| osa-miR2877    | Os07t0239400-01 | Similar to Ethylene-responsive small GTP-binding protein. | 0.0843 |
| osa-miR5532    | Os05t0155200-01 | Similar to Ethylene receptor.                             | 0.5000 |

#### V2-10A

|                |                 |                                                                                                                                     |        |
|----------------|-----------------|-------------------------------------------------------------------------------------------------------------------------------------|--------|
| osa-miR1432-5p | Os04t0169100-01 | Similar to Ethylene receptor-like protein 1.                                                                                        | 0.2500 |
| osa-miR396a-5p | Os03t0294700-01 | Putative E3 ubiquitin ligase, Ethylene-overproduction protein1, Drought and submergence tolerance, Regulation of ethylene synthesis | 0.1646 |
| osa-miR2932    | Os09t0490200-01 | Similar to Ethylene signal transcription factor.                                                                                    | 0.5000 |

#### V2-10B

|                |                 |                                                                                                                                                           |        |
|----------------|-----------------|-----------------------------------------------------------------------------------------------------------------------------------------------------------|--------|
| osa-miR2093-3p | Os03t0324300-05 | Similar to ETHYLENE-INSENSITIVE3-like 1 protein.                                                                                                          | 0.5000 |
| osa-miR2093-3p | Os03t0324300-04 | Similar to ETHYLENE-INSENSITIVE3-like 1 protein.                                                                                                          | 0.5000 |
| osa-miR2093-3p | Os03t0324300-02 | Similar to ETHYLENE-INSENSITIVE3-like 1 protein.                                                                                                          | 0.5000 |
| osa-miR2102-5p | Os02t0764700-01 | Similar to Ethylene-responsive transcription factor 4 (Ethylene-responsive element binding factor 4) (Related to APETALA-2 protein 5) (EREBP-4) (AtERF4). | 0.5000 |

Supplementary Table 5. Prediction of targets of Unique miRNAs involved in auxin pathway. The miRNAs unique to V1(SR-159) or V2 (SR-157) were searched for their targets using miRbase ([www.mirbase.org](http://www.mirbase.org)) and pSRNA Target Server (<https://plantgrn.noble.org/psRNATarget/email>).

| miRNA          | Targets         | Target Description                                                   | P-value |
|----------------|-----------------|----------------------------------------------------------------------|---------|
| <b>V1-0A</b>   |                 |                                                                      |         |
| osa-miR2118q   | Os08t0550700-00 | Similar to Auxin induced protein.                                    | 0.5000  |
| osa-miR2118q   | Os04t0662400-01 | Auxin responsive SAUR protein family protein.                        | 0.5000  |
| osa-miR5337b   | Os04t0442000-01 | Similar to Auxin response factor 2 (ARF1-binding protein) (ARF1-BP). | 0.5000  |
| osa-miR160f-5p | Os04t0690600-01 | Similar to Auxin response factor 13.                                 | 0.1527  |
| osa-miR160f-5p | Os06t0685700-01 | Similar to Auxin response factor 16.                                 | 0.1527  |
| osa-miR160f-5p | Os04t0519700-01 | Similar to Auxin response factor 10.                                 | 0.1527  |
| osa-miR160f-5p | Os02t0628600-01 | Similar to Auxin response factor 8.                                  | 0.1527  |
| osa-miR1879    | Os01t0768333-00 | Auxin responsive SAUR protein family protein.                        | 0.5000  |
| <b>V1-0B</b>   |                 |                                                                      |         |
| osa-miR160a-5p | Os06t0685700-01 | Similar to Auxin response factor 16.                                 | 0.1027  |
| osa-miR160a-5p | Os04t0519700-01 | Similar to Auxin response factor 10.                                 | 0.1027  |
| osa-miR160a-5p | Os02t0628600-01 | Similar to Auxin response factor 8.                                  | 0.1027  |
| osa-miR160a-5p | Os04t0690600-01 | Similar to Auxin response factor 13.                                 | 0.1027  |
| osa-miR1863b   | Os04t0671900-03 | Similar to Auxin response factor 12.                                 | 0.2500  |
| osa-miR1863b   | Os04t0671900-02 | Similar to Auxin response factor 12.                                 | 0.2500  |
| osa-miR396f-5p | Os01t0643300-02 | Similar to Auxin efflux carrier protein.                             | 0.0556  |
| osa-miR396f-5p | Os01t0643300-01 | Similar to PIN1-like auxin transport protein.                        | 0.0556  |
| osa-miR3979-3p | Os09t0491740-01 | Auxin efflux carrier domain containing protein.                      | 0.5000  |
| osa-miR444e    | Os11t0221000-01 | Aux/IAA_ARF_dimerisation domain containing protein.                  | 0.0408  |
| osa-miR5083    | Os09t0546400-01 | Similar to Auxin induced protein.                                    | 0.5000  |
| <b>V2-0A</b>   |                 |                                                                      |         |
| osa-miR444e    | Os11t0221000-01 | Aux/IAA_ARF_dimerisation domain containing protein.                  | 0.1904  |
| osa-miR160a-5p | Os06t0685700-01 | Similar to Auxin response factor 16.                                 | 0.0481  |
| osa-miR160a-5p | Os04t0519700-01 | Similar to Auxin response factor 10.                                 | 0.0481  |
| osa-miR160a-5p | Os02t0628600-01 | Similar to Auxin response factor 8.                                  | 0.0481  |
| osa-miR160a-5p | Os04t0690600-01 | Similar to Auxin response factor 13.                                 | 0.0481  |
| osa-miR2118q   | Os08t0550700-00 | Similar to Auxin induced protein.                                    | 0.5000  |
| osa-miR2118q   | Os04t0662400-01 | Auxin responsive SAUR protein family protein.                        | 0.5000  |
| osa-miR396f-5p | Os01t0643300-02 | Similar to Auxin efflux carrier protein.                             | 0.5000  |
| osa-miR396f-5p | Os01t0643300-01 | Similar to PIN1-like auxin transport protein.                        | 0.5000  |
| osa-miR3979-3p | Os09t0491740-01 | Auxin efflux carrier domain containing protein.                      | 0.1250  |
| osa-miR5536    | Os11t0122800-00 | Similar to Auxin Efflux Carrier family protein.                      | 0.5000  |



|                |                 |                                                                                                                                                                 |        |
|----------------|-----------------|-----------------------------------------------------------------------------------------------------------------------------------------------------------------|--------|
| <b>V2-0B</b>   |                 |                                                                                                                                                                 |        |
| osa-miR1861a   | Os04t0664400-02 | Similar to Auxin response factor 11.                                                                                                                            | 0.5000 |
| osa-miR1861a   | Os04t0664400-01 | Auxin response factor 1.                                                                                                                                        | 0.5000 |
| osa-miR1861a   | Os12t0133800-01 | Similar to Auxin efflux carrier.                                                                                                                                | 0.5000 |
| osa-miR1861a   | Os11t0137000-01 | Similar to PIN1-like auxin transport protein.                                                                                                                   | 0.5000 |
| osa-miR1863a   | Os01t0919800-01 | Similar to Efflux carrier of polar auxin transport.                                                                                                             | 0.5000 |
| osa-miR2118p   | Os08t0550700-00 | Similar to Auxin induced protein.                                                                                                                               | 0.2500 |
| osa-miR390-3p  | Os09t0442900-01 | Similar to Axi 1 (Auxin-independent growth promoter)-like protein.                                                                                              | 0.5000 |
| osa-miR396b-3p | Os09t0545400-01 | Similar to Auxin induced protein.                                                                                                                               | 0.1406 |
| osa-miR396h    | Os01t0643300-02 | Similar to Auxin efflux carrier protein.                                                                                                                        | 0.0597 |
| osa-miR396h    | Os01t0643300-01 | Similar to PIN1-like auxin transport protein.                                                                                                                   | 0.0597 |
| osa-miR5075    | Os06t0691400-01 | Similar to IAA-amino acid conjugate hydrolase-like protein (Fragment).                                                                                          | 0.5000 |
| osa-miR530-3p  | Os05t0451900-01 | Similar to Axi 1 (Auxin-independent growth promoter)-like protein.                                                                                              | 0.0883 |
| osa-miR530-5p  | Os06t0702000-01 | Auxin responsive SAUR protein family protein.                                                                                                                   | 0.1156 |
| osa-miR530-5p  | Os04t0690600-01 | Similar to Auxin response factor 13.                                                                                                                            | 0.1156 |
| osa-miR159a.2  | Os01t0560000-01 | Similar to Auxin amidohydrolase.                                                                                                                                | 0.2500 |
| osa-miR1879    | Os01t0768333-00 | Auxin responsive SAUR protein family protein.                                                                                                                   | 0.2500 |
| osa-miR5819    | Os06t0196700-01 | Similar to Auxin response factor 1.                                                                                                                             | 0.5000 |
| osa-miR5819    | Os06t0196700-02 | Auxin response factor, Transcription factor, Cytokinin-mediated inhibition of phosphate transport, Phosphate signaling, Auxin and phosphate starvation response | 0.5000 |
| osa-miR5819    | Os06t0691400-01 | Similar to IAA-amino acid conjugate hydrolase-like protein (Fragment).                                                                                          | 0.5000 |
|                |                 |                                                                                                                                                                 |        |
| <b>V1-5A</b>   |                 |                                                                                                                                                                 |        |
| osa-miR160e-5p | Os06t0685700-01 | Similar to Auxin response factor 16.                                                                                                                            | 0.3850 |
| osa-miR160e-5p | Os04t0519700-01 | Similar to Auxin response factor 10.                                                                                                                            | 0.3850 |
| osa-miR160e-5p | Os02t0628600-01 | Similar to Auxin response factor 8.                                                                                                                             | 0.3850 |
| osa-miR160e-5p | Os04t0690600-01 | Similar to Auxin response factor 13.                                                                                                                            | 0.3850 |
| osa-miR169r-3p | Os02t0628600-01 | Similar to Auxin response factor 8.                                                                                                                             | 0.6668 |
| osa-miR169r-3p | Os02t0143400-00 | Similar to small auxin up RNA1.                                                                                                                                 | 0.6668 |
| osa-miR169r-3p | Os08t0520550-01 | Similar to Auxin response factor 21.                                                                                                                            | 0.6668 |
| osa-miR2865    | Os02t0164900-01 | Similar to Auxin response factor 3.                                                                                                                             | 0.6668 |
| osa-miR2865    | Os02t0164900-02 | Similar to Auxin response factor 3.                                                                                                                             | 0.6668 |
| osa-miR812q    | Os01t0856500-04 | Similar to auxin transporter-like protein 1.                                                                                                                    | 0.6531 |
| osa-miR812q    | Os01t0856500-03 | Similar to auxin transporter-like protein 1.                                                                                                                    | 0.6531 |
|                |                 |                                                                                                                                                                 |        |
| <b>V1-5B</b>   |                 |                                                                                                                                                                 |        |
| osa-miR156b-3p | Os01t0924400-01 | Similar to Auxin-induced basic helix-loop-helix transcription factor.                                                                                           | 0.8571 |
| osa-miR159a.2  | Os01t0560000-01 | Similar to Auxin amidohydrolase.                                                                                                                                | 0.3673 |
| osa-miR1863a   | Os01t0919800-01 | Similar to Efflux carrier of polar auxin transport.                                                                                                             | 0.8571 |

|                |                 |                                                                                                                                                                 |        |
|----------------|-----------------|-----------------------------------------------------------------------------------------------------------------------------------------------------------------|--------|
| osa-miR1863b   | Os01t0221100-01 | GH3 auxin-responsive promoter family protein.                                                                                                                   | 0.8571 |
| osa-miR2118n   | Os08t0550700-00 | Similar to Auxin induced protein.                                                                                                                               | 0.8571 |
| osa-miR2118n   | Os04t0662400-01 | Auxin responsive SAUR protein family protein.                                                                                                                   | 0.8571 |
| osa-miR2863b   | Os06t0603000-01 | Heme-oxygenase, Phytochrome chromophore biosynthesis, Nitric oxide- and auxin-induced lateral root formation                                                    | 0.8571 |
| osa-miR5795    | Os11t0186500-00 | Similar to GH3 auxin-responsive promoter family protein.                                                                                                        | 0.8571 |
| osa-miR5819    | Os06t0196700-01 | Similar to Auxin response factor 1.                                                                                                                             | 0.8571 |
| osa-miR5819    | Os06t0196700-02 | Auxin response factor, Transcription factor, Cytokinin-mediated inhibition of phosphate transport, Phosphate signaling, Auxin and phosphate starvation response | 0.8571 |
| osa-miR3979-3p | Os09t0491740-01 | Auxin efflux carrier domain containing protein.                                                                                                                 | 0.6667 |
| <b>V2-5A</b>   |                 |                                                                                                                                                                 |        |
| osa-miR159a.2  | Os01t0560000-01 | Similar to Auxin amidohydrolase.                                                                                                                                | 0.8452 |
| osa-miR159a.2  | Os11t0247000-01 | Similar to Auxin-inducible protein.                                                                                                                             | 0.8452 |
| osa-miR159a.2  | Os11t0247000-02 | Similar to Auxin-inducible protein.                                                                                                                             | 0.8452 |
| osa-miR1848    | Os11t0673200-01 | Similar to Auxin-induced beta-glucosidase.                                                                                                                      | 0.8452 |
| osa-miR396b-3p | Os09t0545400-01 | Similar to Auxin induced protein.                                                                                                                               | 0.8452 |
| osa-miR396c-5p | Os04t0671900-03 | Similar to Auxin response factor 12.                                                                                                                            | 0.1117 |
| osa-miR396c-5p | Os04t0671900-02 | Similar to Auxin response factor 12.                                                                                                                            | 0.1117 |
| osa-miR2872    | Os02t0557200-01 | Similar to Auxin response factor 1.                                                                                                                             | 0.1633 |
| osa-miR5337b   | Os04t0442000-01 | Similar to Auxin response factor 2 (ARF1-binding protein) (ARF1-BP).                                                                                            | 0.5817 |
| osa-miR6248    | Os06t0660200-01 | Similar to Auxin efflux carrier protein.                                                                                                                        | 0.5817 |
| <b>V2-5B</b>   |                 |                                                                                                                                                                 |        |
| osa-miR167b    | Os04t0671900-03 | Similar to Auxin response factor 12.                                                                                                                            | 0.5926 |
| osa-miR167b    | Os04t0671900-02 | Similar to Auxin response factor 12.                                                                                                                            | 0.5926 |
| osa-miR167b    | Os02t0164900-02 | Similar to Auxin response factor 3.                                                                                                                             | 0.5926 |
| osa-miR167b    | Os12t0613700-02 | Similar to Auxin response factor 25.                                                                                                                            | 0.5926 |
| osa-miR167b    | Os02t0164900-01 | Similar to Auxin response factor 3.                                                                                                                             | 0.5926 |
| osa-miR5144-3p | Os09t0545500-00 | Similar to SAUR55 - auxin-responsive SAUR family member.                                                                                                        | 0.8889 |
| osa-miR529a    | Os03t0742800-02 | Similar to Auxin-responsive protein IAA14 (Indoleacetic acid-induced protein 14) (SOLITARY-ROOT protein).                                                       | 0.1756 |
| osa-miR529a    | Os03t0742800-01 | Similar to Auxin-responsive protein IAA14 (Indoleacetic acid-induced protein 14) (SOLITARY-ROOT protein).                                                       | 0.1756 |
| osa-miR535-5p  | Os08t0118500-00 | Similar to Auxin-induced SAUR-like protein.                                                                                                                     | 0.2082 |
| osa-miR535-5p  | Os01t0741900-01 | Similar to Auxin-responsive protein IAA26 (Indoleacetic acid-induced protein 26) (Phytochrome-associated protein 1).                                            | 0.2082 |
| osa-miR5814    | Os04t0671900-03 | Similar to Auxin response factor 12.                                                                                                                            | 0.2460 |

|                 |                 |                                                                                                                                                                 |        |
|-----------------|-----------------|-----------------------------------------------------------------------------------------------------------------------------------------------------------------|--------|
| osa-miR5814     | Os04t0671900-02 | Similar to Auxin response factor 12.                                                                                                                            | 0.2460 |
|                 |                 |                                                                                                                                                                 |        |
| <b>V1-10A</b>   |                 |                                                                                                                                                                 |        |
| osa-miR164a     | Os04t0459000-01 | Multidrug-resistance(MDR)-like ATP Binding Cassette B (ABCB) transporter, P-glyco-protein, Auxin transport, Iron homeostasis                                    | 0.2500 |
| osa-miR164e     | Os04t0459000-01 | Multidrug-resistance(MDR)-like ATP Binding Cassette B (ABCB) transporter, P-glyco-protein, Auxin transport, Iron homeostasis                                    | 0.1432 |
| osa-miR2863b    | Os06t0603000-01 | Heme-oxygenase, Phytochrome chromophore biosynthesis, Nitric oxide- and auxin-induced lateral root formation                                                    | 0.5000 |
| osa-miR319a-3p  | Os02t0628600-01 | Similar to Auxin response factor 8.                                                                                                                             | 0.5000 |
| osa-miR5338     | Os01t0805500-00 | Similar to indole-3-acetate beta-glucosyltransferase.                                                                                                           | 0.5000 |
| osa-miR5795     | Os11t0186500-00 | Similar to GH3 auxin-responsive promoter family protein.                                                                                                        | 0.5000 |
|                 |                 |                                                                                                                                                                 |        |
| <b>V1-10B</b>   |                 |                                                                                                                                                                 |        |
| osa-miR160a-5p  | Os06t0685700-01 | Similar to Auxin response factor 16.                                                                                                                            | 0.0820 |
| osa-miR160a-5p  | Os04t0519700-01 | Similar to Auxin response factor 10.                                                                                                                            | 0.0820 |
| osa-miR160a-5p  | Os02t0628600-01 | Similar to Auxin response factor 8.                                                                                                                             | 0.0820 |
| osa-miR160a-5p  | Os04t0690600-01 | Similar to Auxin response factor 13.                                                                                                                            | 0.0820 |
| osa-miR166b-5p  | Os06t0196700-02 | Auxin response factor, Transcription factor, Cytokinin-mediated inhibition of phosphate transport, Phosphate signaling, Auxin and phosphate starvation response | 0.5000 |
| osa-miR166b-5p  | Os06t0196700-01 | Similar to Auxin response factor 1.                                                                                                                             | 0.5000 |
| osa-miR5076     | Os08t0554050-01 | Similar to auxin-independent growth promoter.                                                                                                                   | 0.2548 |
| osa-miR529a     | Os03t0742800-02 | Similar to Auxin-responsive protein IAA14 (Indoleacetic acid-induced protein 14) (SOLITARY-ROOT protein).                                                       | 0.0560 |
| osa-miR529a     | Os03t0742800-01 | Similar to Auxin-responsive protein IAA14 (Indoleacetic acid-induced protein 14) (SOLITARY-ROOT protein).                                                       | 0.0560 |
| osa-miR5827     | Os06t0335500-02 | Similar to Auxin-responsive protein IAA21.                                                                                                                      | 0.2548 |
| osa-miR5827     | Os06t0335500-01 | AUX/IAA protein family protein.                                                                                                                                 | 0.2548 |
| osa-miR810b.1   | Os04t0517900-01 | Auxin responsive SAUR protein family protein.                                                                                                                   | 0.1166 |
| osa-miR810b.1   | Os01t0221100-02 | GH3 auxin-responsive promoter family protein.                                                                                                                   | 0.1166 |
| osa-miR810b.1   | Os01t0221100-01 | GH3 auxin-responsive promoter family protein.                                                                                                                   | 0.1166 |
|                 |                 |                                                                                                                                                                 |        |
| <b>V2-10A</b>   |                 |                                                                                                                                                                 |        |
| osa-miR166b-5p  | Os06t0196700-02 | Auxin response factor, Transcription factor, Cytokinin-mediated inhibition of phosphate transport, Phosphate signaling, Auxin and phosphate starvation response | 0.5000 |
| osa-miR166b-5p  | Os06t0196700-01 | Similar to Auxin response factor 1.                                                                                                                             | 0.5000 |
| osa-miR1846d-5p | Os06t0671150-00 | Auxin responsive SAUR protein family protein.                                                                                                                   | 0.1646 |

|                |                 |                                                                                                                              |        |
|----------------|-----------------|------------------------------------------------------------------------------------------------------------------------------|--------|
| osa-miR171f-5p | Os12t0601300-01 | Similar to Auxin-responsive protein (Aux/IAA) (Fragment).                                                                    | 0.5000 |
| <b>V2-10B</b>  |                 |                                                                                                                              |        |
| osa-miR160e-5p | Os06t0685700-01 | Similar to Auxin response factor 16.                                                                                         | 0.1245 |
| osa-miR160e-5p | Os04t0519700-01 | Similar to Auxin response factor 10.                                                                                         | 0.1245 |
| osa-miR160e-5p | Os02t0628600-01 | Similar to Auxin response factor 8.                                                                                          | 0.1245 |
| osa-miR160e-5p | Os04t0690600-01 | Similar to Auxin response factor 13.                                                                                         | 0.1245 |
| osa-miR160e-5p | Os04t0459000-01 | Multidrug-resistance(MDR)-like ATP Binding Cassette B (ABCB) transporter, P-glyco-protein, Auxin transport, Iron homeostasis | 0.1245 |
| osa-miR166a-5p | Os04t0662400-01 | Auxin responsive SAUR protein family protein.                                                                                | 0.1245 |
| osa-miR396h    | Os01t0643300-02 | Similar to Auxin efflux carrier protein.                                                                                     | 0.0435 |
| osa-miR396h    | Os01t0643300-01 | Similar to PIN1-like auxin transport protein.                                                                                | 0.0435 |
| osa-miR5536    | Os11t0122800-00 | Similar to Auxin Efflux Carrier family protein.                                                                              | 0.5000 |
| osa-miR166h-5p | Os06t0671150-00 | Auxin responsive SAUR protein family protein.                                                                                | 0.2500 |

Website link: Micro-RNA sequencing data has been submitted at NCBI GEO server with SRA submission ID: SUB5947694, bio project no: PRJNA553304 and can be viewed at the following link:  
<https://dataview.ncbi.nlm.nih.gov/object/PRJNA553304?reviewer=2aahokaanulp7us6lq1a63j31p>
